# Supplementary material
Source: Springer Nature journal article supplement (https://www.springermedizin.de/resource/supplementary/12935_2012_367_MOESM7_ESM.pdf/9540396)

**A**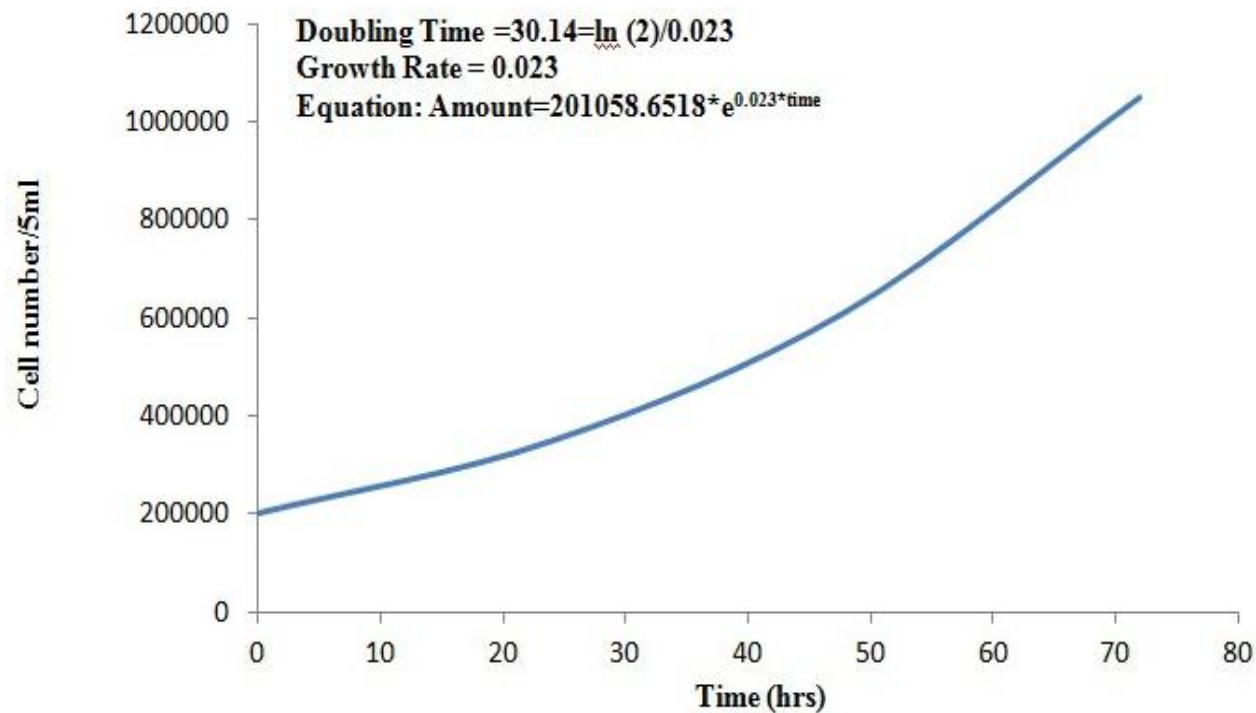**B**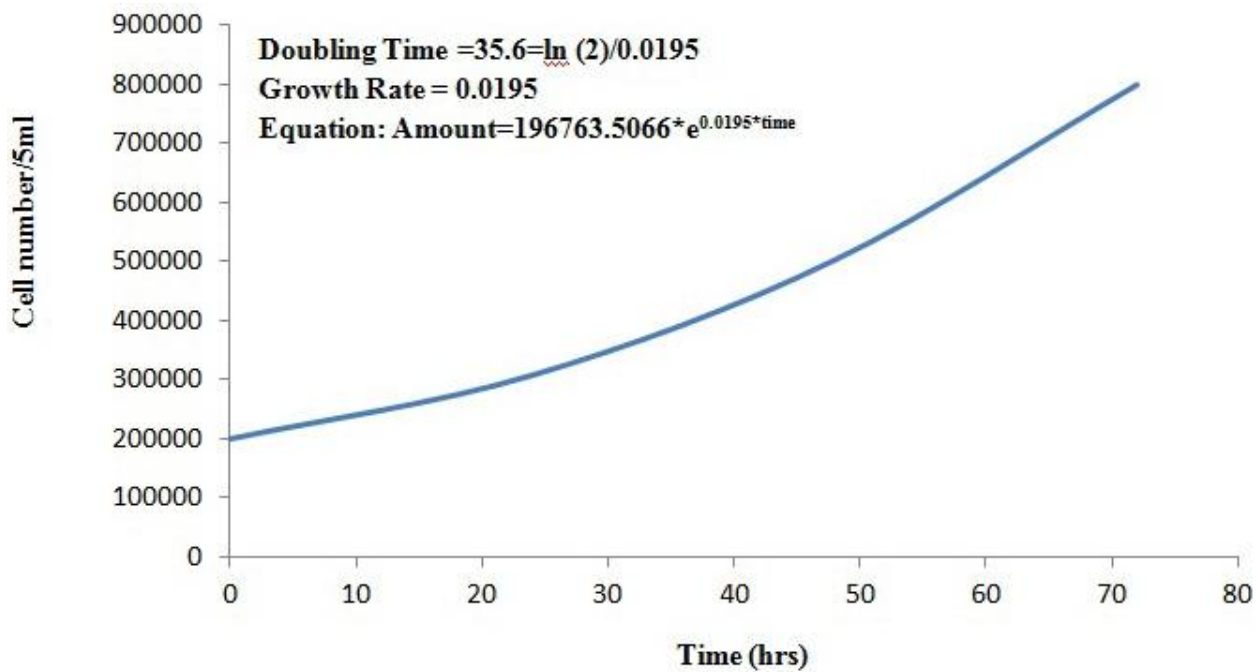

Supplement: MOESM7 [file 9540396]
